# Supplementary material for: On the role of the counter-ion in defining water structure and dynamics: order, structure and dynamics in hydrophilic and hydrophobic gadolinium salt complexes
Source: Royal Society of Chemistry journal article supplement (doi:10.1039/b606206g), 2006-01-01
Supplement: b606206g.pdf [file b606206g.pdf]

ESI Analyses of the T dependence of the relaxivity and (for selected complexes) the field dependence of the relaxivity for salts of  $[\text{Gd.2}]^{3+}$ .

## Acetate

a) VT  $^1\text{H}$  - 20 MHz

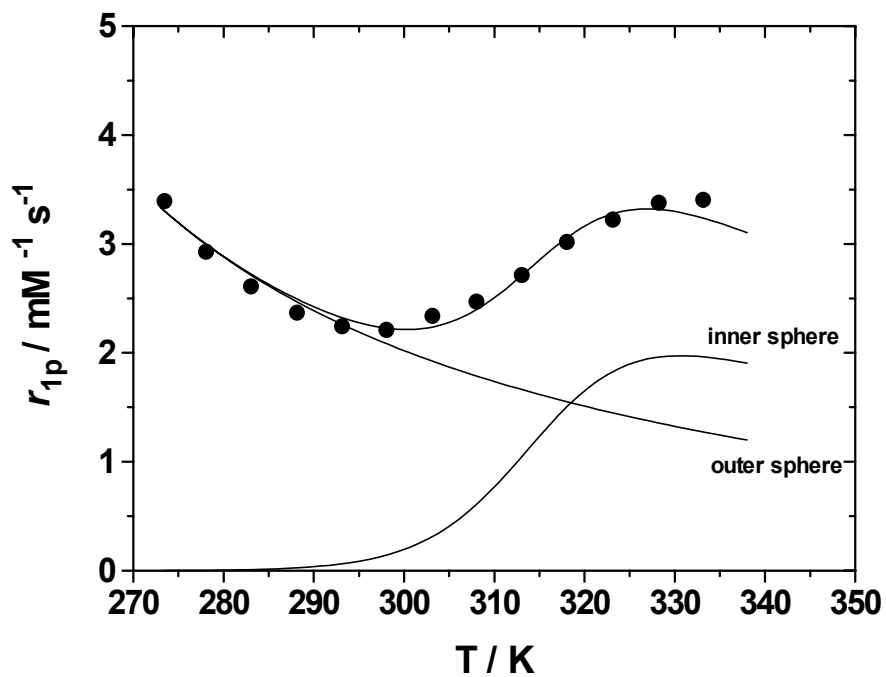

b) NMRD - 25°C, pH 6

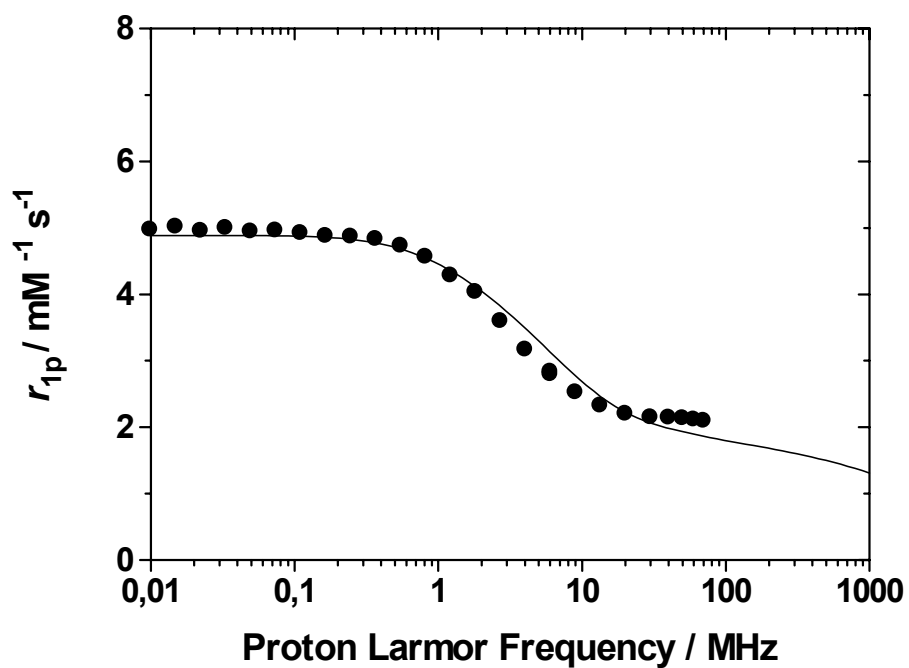

## Nitrate

VT  $^1\text{H}$  - 20 MHz

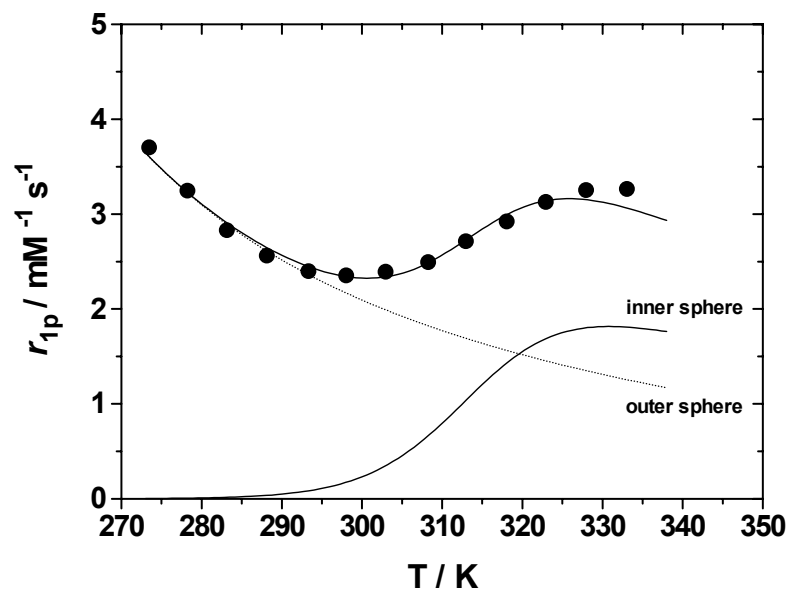

## Triflate

VT  $^1\text{H}$  - 20 MHz

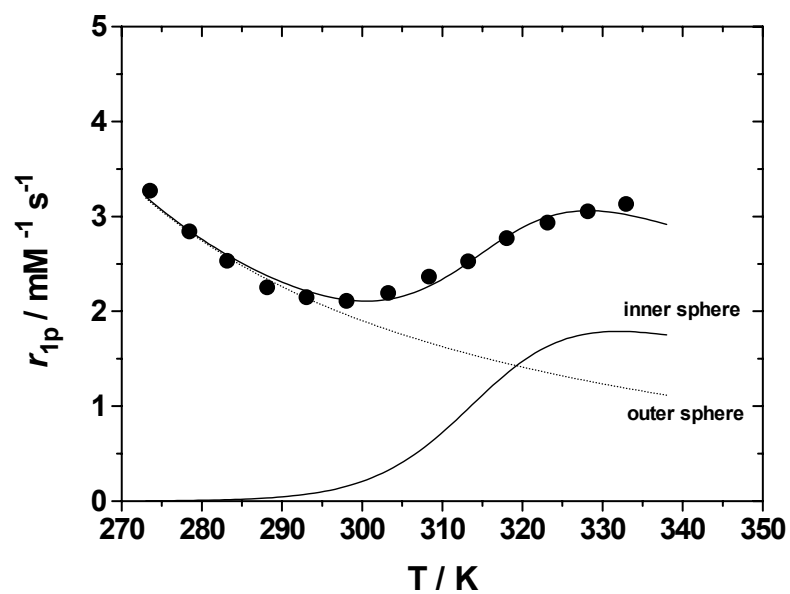

## Chloride

a) VT  $^1\text{H}$  - 20 MHz

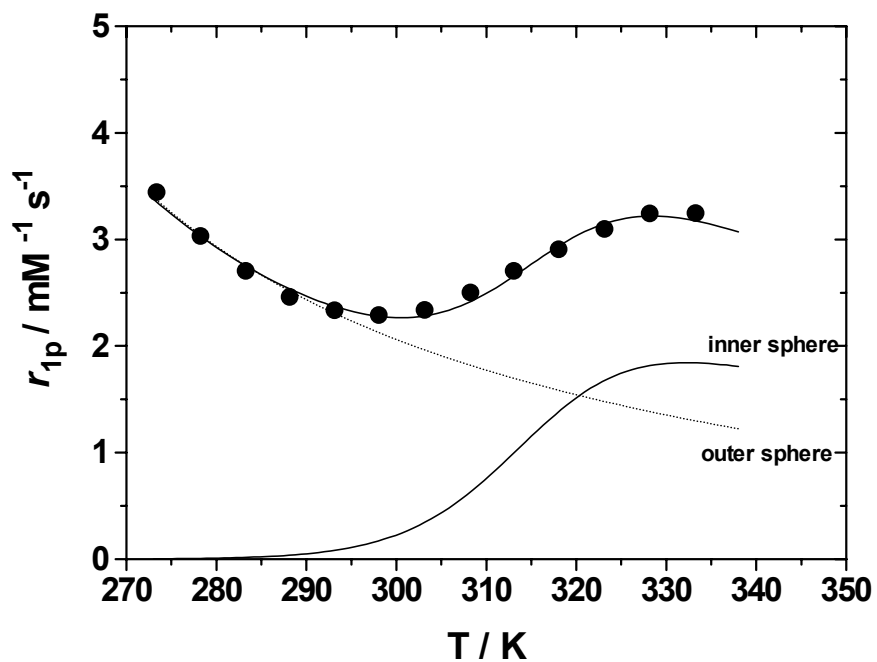

b) NMRD - 25°C, pH 6

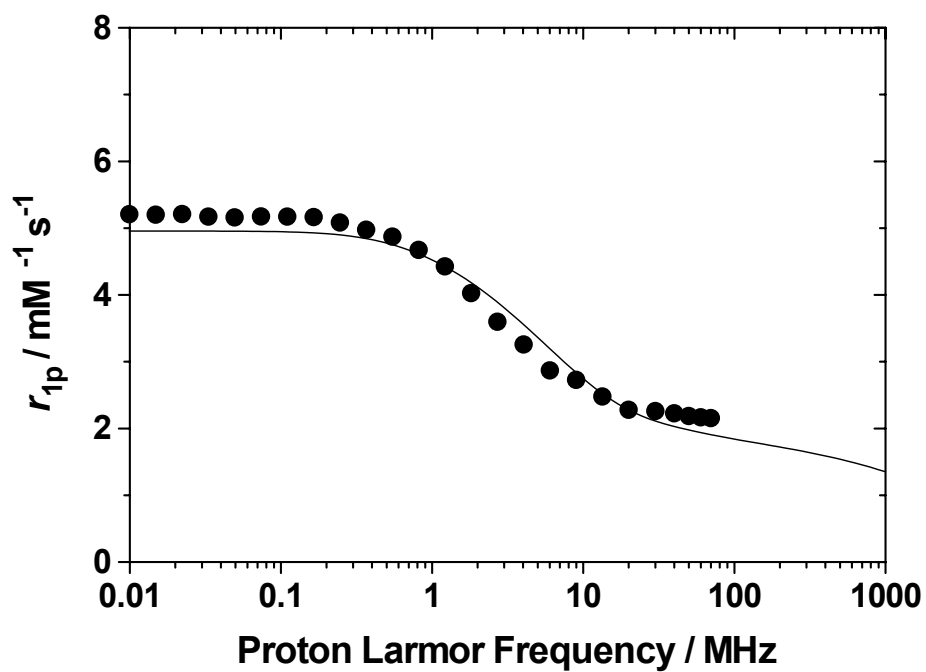

## Bromide

a) VT  $^1\text{H}$  - 20 MHz

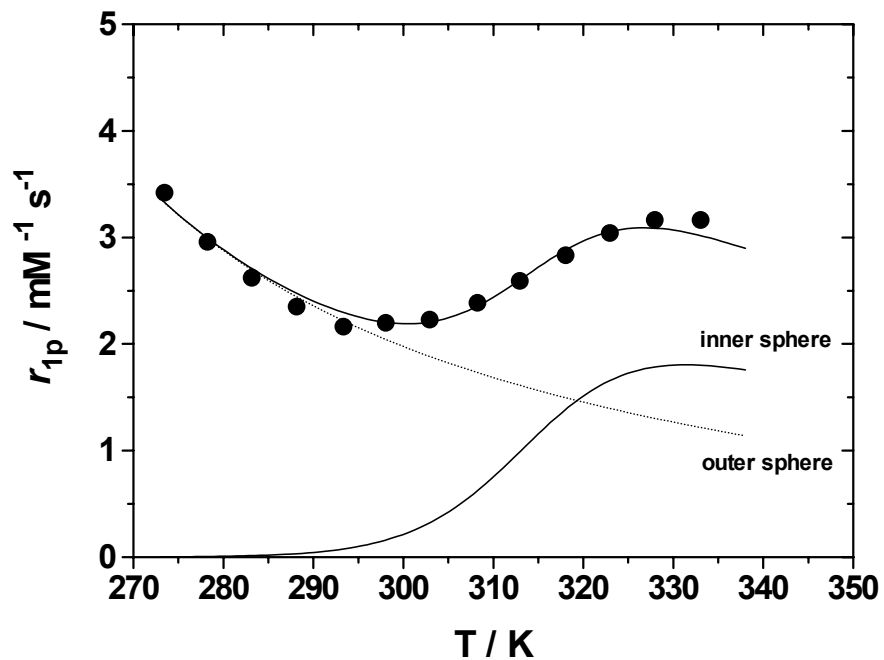

b) NMRD - 25°C, pH 6

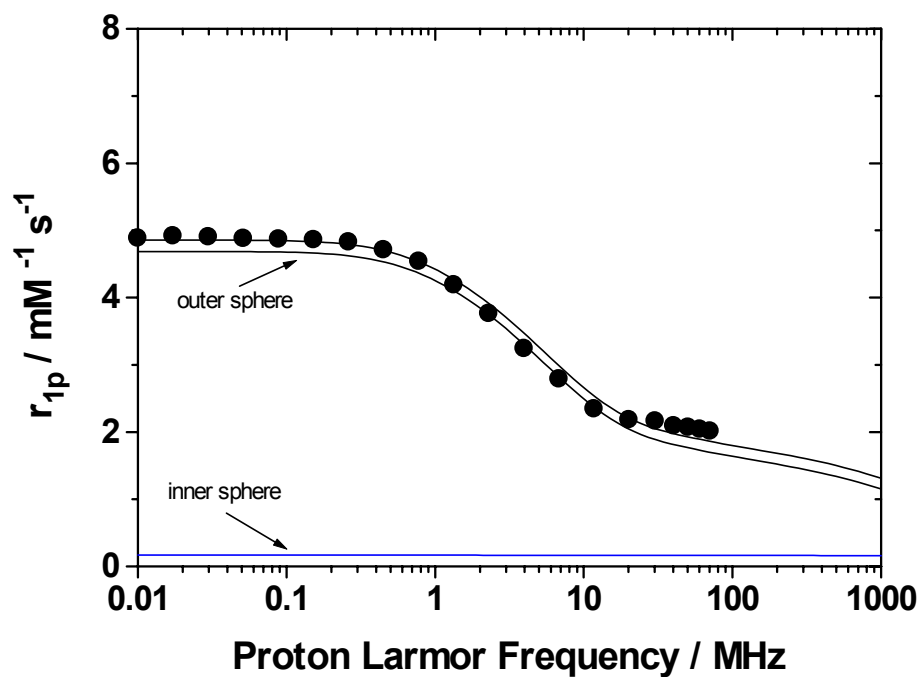

## Iodide

a) VT 1H - 20 MHz

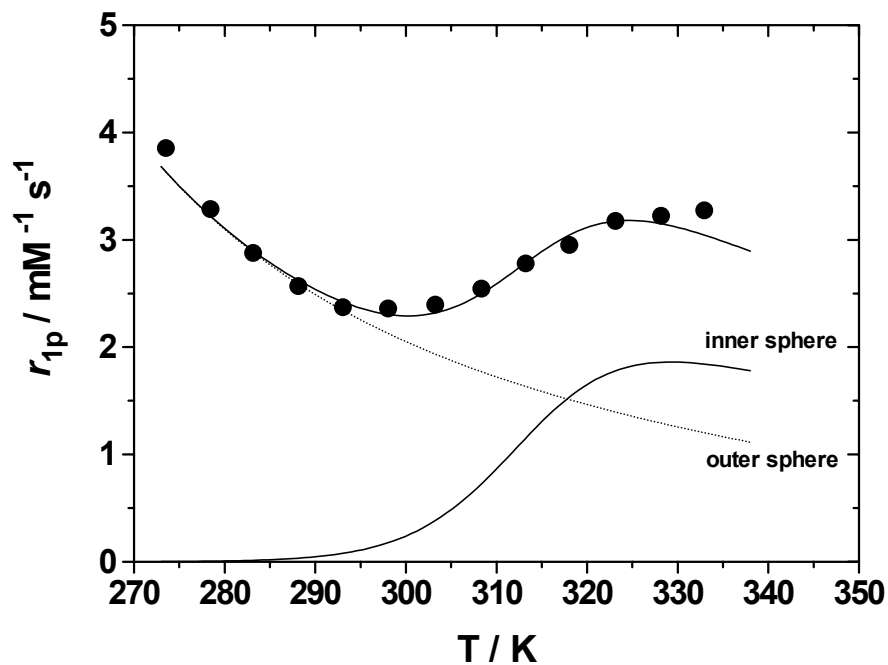

b) NMRD - 25°C, pH 6

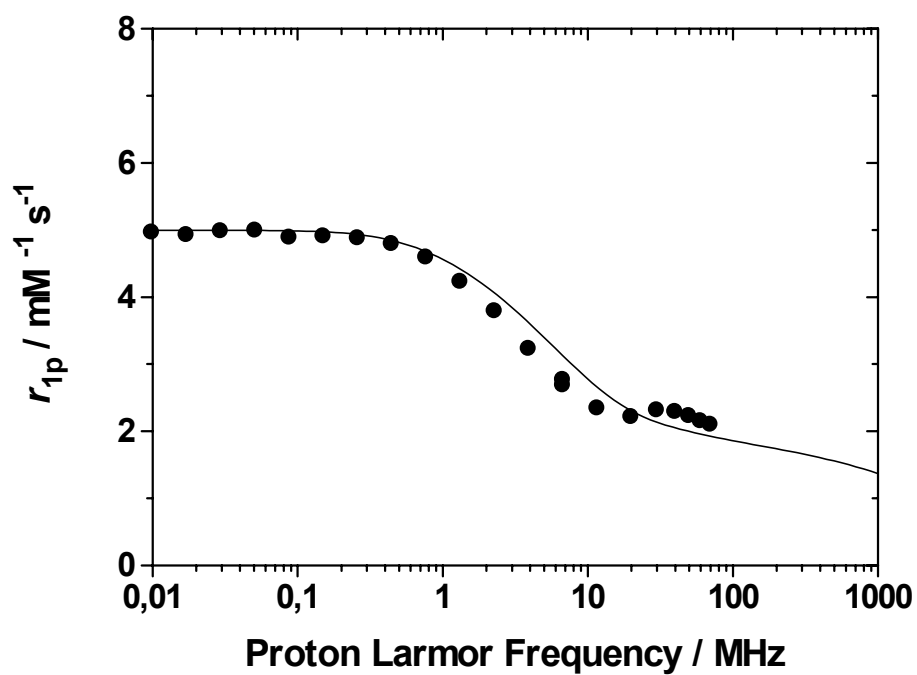

**Table:** Relaxation parameters for [Gd.2] salts (298 K)

|                                                                           | Acetate | Nitrate | Triflate | Chloride | Bromide | Iodide |
|---------------------------------------------------------------------------|---------|---------|----------|----------|---------|--------|
| $r_{1p}$ (mM <sup>-1</sup> s <sup>-1</sup> ) <sup>a</sup>                 | 2.20    | 2.34    | 2.10     | 2.28     | 2.19    | 2.35   |
| $\Delta^2$ (s <sup>-1</sup> ; $\times 10^{19}$ ) <sup>b</sup>             | 1.5     | 1.5     | 1.5      | 1.5      | 1.5     | 1.5    |
| $\tau_V$ (ps) <sup>b</sup>                                                | 8.0     | 8.0     | 8.0      | 8.0      | 8.0     | 8.0    |
| $\Delta H_V$ (kJ) <sup>c</sup>                                            | 5.0     | 5.0     | 5.0      | 5.0      | 5.0     | 5.0    |
| $\tau_R$ (ps)                                                             | 100     | 90      | 98       | 100      | 90      | 103    |
| $\Delta H_R$ (kJ) <sup>b</sup>                                            | 14      | 14      | 14       | 14       | 14      | 14     |
| $\tau_M$ ( $\mu$ s)                                                       | 119.6   | 96.6    | 95       | 100      | 105     | 101    |
| $\Delta H_M$ (kJ)                                                         | 122     | 114     | 110      | 106.9    | 114     | 117    |
| $q$ <sup>c</sup>                                                          | 1       | 1       | 1        | 1        | 1       | 1      |
| $r$ (Å) <sup>c</sup>                                                      | 3.0     | 3.0     | 3.0      | 3.0      | 3.0     | 3.0    |
| $a$ (Å)                                                                   | 4.25    | 4.15    | 4.40     | 4.22     | 4.30    | 4.20   |
| $D$<br>(cm <sup>2</sup> s <sup>-1</sup> ; $\times 10^{-5}$ ) <sup>c</sup> | 2.24    | 2.24    | 2.24     | 2.24     | 2.24    | 2.24   |
| $\Delta H_D$ (kJ)                                                         | -21     | -23     | -22      | -21      | -22     | -25    |

<sup>a</sup> 20 MHz, 298 K; <sup>b</sup> adjusted for bromide and fixed for the other salts; <sup>c</sup> fixed in the fitting procedure

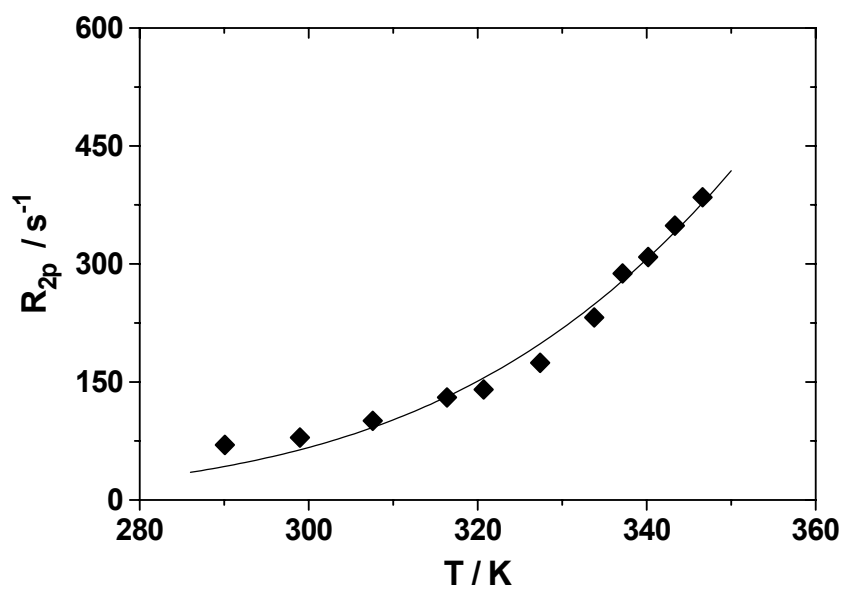

Figure A Variable temperature  $^{17}\text{O}$  NMR measurements of the transverse relaxation rate  $R_{2p}$  for  $[\text{Gd}.1]\text{Cl}_3$  (2.1 T, 47 mM, pH 5.5) showing the fit to the observed data

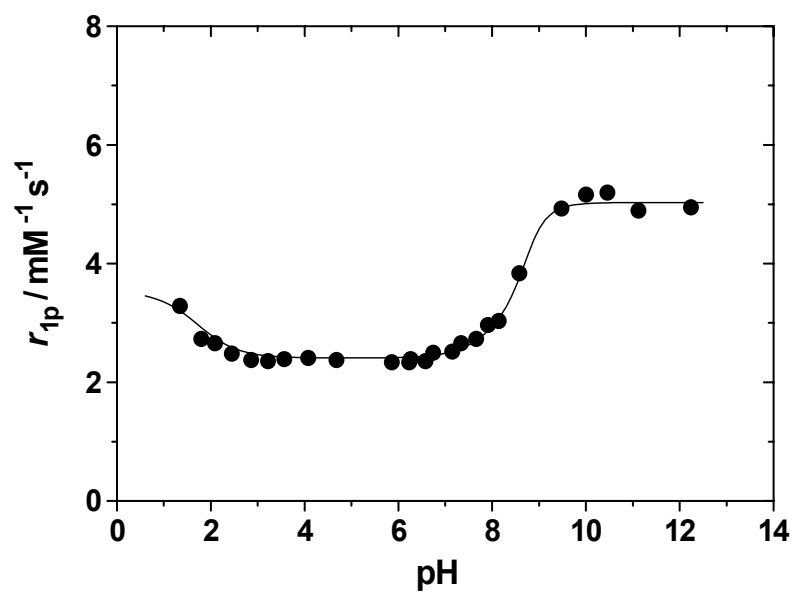

Figure B Variation of the proton relaxivity of  $[\text{Gd.1}]\text{Cl}_3$  with pH (298K, 20MHz), showing the fit to the observed data (ref. 21b for details of the fitting process)
